# Supplementary material
Source: publisher site journal article supplement (https://www.dovepress.com/article/416450)
Supplement: Supplementary file 1 [file get_supplementary_file.php]

TRIPOD Checklist: Prediction Model Development and Validation

| Section/Topic                | Item | Checklist Item                                                                                                                                                                                            | Page  |
|------------------------------|------|-----------------------------------------------------------------------------------------------------------------------------------------------------------------------------------------------------------|-------|
| <b>Title and abstract</b>    |      |                                                                                                                                                                                                           |       |
| Title                        | 1    | D;V Identify the study as developing and/or validating a multivariable prediction model, the target population, and the outcome to be predicted.                                                          | 1     |
| Abstract                     | 2    | D;V Provide a summary of objectives, study design, setting, participants, sample size, predictors, outcome, statistical analysis, results, and conclusions.                                               | 2     |
| <b>Introduction</b>          |      |                                                                                                                                                                                                           |       |
| Background and objectives    | 3a   | D;V Explain the medical context (including whether diagnostic or prognostic) and rationale for developing or validating the multivariable prediction model, including references to existing models.      | 3     |
|                              | 3b   | D;V Specify the objectives, including whether the study describes the development or validation of the model or both.                                                                                     | 3     |
| <b>Methods</b>               |      |                                                                                                                                                                                                           |       |
| Source of data               | 4a   | D;V Describe the study design or source of data (e.g., randomized trial, cohort, or registry data), separately for the development and validation data sets, if applicable.                               | 4     |
|                              | 4b   | D;V Specify the key study dates, including start of accrual; end of accrual; and, if applicable, end of follow-up.                                                                                        | 4     |
| Participants                 | 5a   | D;V Specify key elements of the study setting (e.g., primary care, secondary care, general population) including number and location of centres.                                                          | 4     |
|                              | 5b   | D;V Describe eligibility criteria for participants.                                                                                                                                                       | 4     |
|                              | 5c   | D;V Give details of treatments received, if relevant.                                                                                                                                                     | NA    |
| Outcome                      | 6a   | D;V Clearly define the outcome that is predicted by the prediction model, including how and when assessed.                                                                                                | 6     |
|                              | 6b   | D;V Report any actions to blind assessment of the outcome to be predicted.                                                                                                                                | NA    |
| Predictors                   | 7a   | D;V Clearly define all predictors used in developing or validating the multivariable prediction model, including how and when they were measured.                                                         | 5,6   |
|                              | 7b   | D;V Report any actions to blind assessment of predictors for the outcome and other predictors.                                                                                                            | NA    |
| Sample size                  | 8    | D;V Explain how the study size was arrived at.                                                                                                                                                            | 6     |
| Missing data                 | 9    | D;V Describe how missing data were handled (e.g., complete-case analysis, single imputation, multiple imputation) with details of any imputation method.                                                  | 7     |
| Statistical analysis methods | 10a  | D Describe how predictors were handled in the analyses.                                                                                                                                                   | 7     |
|                              | 10b  | D Specify type of model, all model-building procedures (including any predictor selection), and method for internal validation.                                                                           | 7     |
|                              | 10c  | V For validation, describe how the predictions were calculated.                                                                                                                                           | 7     |
|                              | 10d  | D;V Specify all measures used to assess model performance and, if relevant, to compare multiple models.                                                                                                   | 7     |
|                              | 10e  | V Describe any model updating (e.g., recalibration) arising from the validation, if done.                                                                                                                 | NA    |
| Risk groups                  | 11   | D;V Provide details on how risk groups were created, if done.                                                                                                                                             | NA    |
| Development vs. validation   | 12   | V For validation, identify any differences from the development data in setting, eligibility criteria, outcome, and predictors.                                                                           | NA    |
| <b>Results</b>               |      |                                                                                                                                                                                                           |       |
| Participants                 | 13a  | D;V Describe the flow of participants through the study, including the number of participants with and without the outcome and, if applicable, a summary of the follow-up time. A diagram may be helpful. | NA    |
|                              | 13b  | D;V Describe the characteristics of the participants (basic demographics, clinical features, available predictors), including the number of participants with missing data for predictors and outcome.    | NA    |
|                              | 13c  | V For validation, show a comparison with the development data of the distribution of important variables (demographics, predictors and outcome).                                                          | NA    |
| Model development            | 14a  | D Specify the number of participants and outcome events in each analysis.                                                                                                                                 | NA    |
|                              | 14b  | D If done, report the unadjusted association between each candidate predictor and outcome.                                                                                                                | NA    |
| Model specification          | 15a  | D Present the full prediction model to allow predictions for individuals (i.e., all regression coefficients, and model intercept or baseline survival at a given time point).                             | NA    |
|                              | 15b  | D Explain how to use the prediction model.                                                                                                                                                                | NA    |
| Model performance            | 16   | D;V Report performance measures (with CIs) for the prediction model.                                                                                                                                      | NA    |
| Model-updating               | 17   | V If done, report the results from any model updating (i.e., model specification, model performance).                                                                                                     | NA    |
| <b>Discussion</b>            |      |                                                                                                                                                                                                           |       |
| Limitations                  | 18   | D;V Discuss any limitations of the study (such as nonrepresentative sample, few events per predictor, missing data).                                                                                      | 8     |
| Interpretation               | 19a  | V For validation, discuss the results with reference to performance in the development data, and any other validation data.                                                                               | NA    |
|                              | 19b  | D;V Give an overall interpretation of the results, considering objectives, limitations, results from similar studies, and other relevant evidence.                                                        | NA    |
| Implications                 | 20   | D;V Discuss the potential clinical use of the model and implications for future research.                                                                                                                 | 8,9   |
| <b>Other information</b>     |      |                                                                                                                                                                                                           |       |
| Supplementary information    | 21   | D;V Provide information about the availability of supplementary resources, such as study protocol, Web calculator, and data sets.                                                                         | 10,17 |
| Funding                      | 22   | D;V Give the source of funding and the role of the funders for the present study.                                                                                                                         | 10    |

Items relevant only to the development of a prediction model are denoted by D, items relating solely to a validation of a prediction model are denoted by V, and items relating to both are denoted D;V. We recommend using the TRIPOD Checklist in conjunction with the TRIPOD Explanation and Elaboration document.

## Supplemental file 2. Case report forms

### Case report forms for CPSP after VATS

| <b>Preoperative potential predictors</b>    |                                                                                                                                                                                                                                                     |
|---------------------------------------------|-----------------------------------------------------------------------------------------------------------------------------------------------------------------------------------------------------------------------------------------------------|
| Age                                         |                                                                                                                                                                                                                                                     |
| Sex                                         | <input type="checkbox"/> Male <input type="checkbox"/> Female                                                                                                                                                                                       |
| BMI                                         |                                                                                                                                                                                                                                                     |
| Smoking history                             | <input type="checkbox"/> Past <input type="checkbox"/> Current <input type="checkbox"/> Never                                                                                                                                                       |
| The age-adjusted Charlson Comorbidity Index |                                                                                                                                                                                                                                                     |
| The APAIS score (the first four items)      |                                                                                                                                                                                                                                                     |
| The FRAIL scale score                       | <input type="checkbox"/> 0 <input type="checkbox"/> 1 <input type="checkbox"/> 2                                                                                                                                                                    |
| Preoperative pulmonary ventilation function | <input type="checkbox"/> Normal <input type="checkbox"/> Small airway dysfunction<br><input type="checkbox"/> Restrictive hypoventilation<br><input type="checkbox"/> Obstructive hypoventilation<br><input type="checkbox"/> Mixed hypoventilation |
| <b>Intraoperative potential predictors</b>  |                                                                                                                                                                                                                                                     |
| Type of surgery                             | <input type="checkbox"/> Pneumonectomy <input type="checkbox"/> Lobectomy<br><input type="checkbox"/> Segmentectomy <input type="checkbox"/> Wedge resection<br><input type="checkbox"/> Biopsy <input type="checkbox"/> Explorative surgery        |
| Analgesic regimen                           | <input type="checkbox"/> Nerve block <input type="checkbox"/> PCIA <input type="checkbox"/> Both <input type="checkbox"/> Neither                                                                                                                   |
| Duration of surgery                         |                                                                                                                                                                                                                                                     |
| <b>Postoperative predictors</b>             |                                                                                                                                                                                                                                                     |
| Duration of chest tube drainage             |                                                                                                                                                                                                                                                     |
| Prince-Henry scale score on POD1            |                                                                                                                                                                                                                                                     |
| DN4 score on POD1                           |                                                                                                                                                                                                                                                     |
| Prince-Henry scale score on POD14           |                                                                                                                                                                                                                                                     |
| DN4 score on POD14                          |                                                                                                                                                                                                                                                     |

| <b>Outcome</b>     |                                                          |
|--------------------|----------------------------------------------------------|
| NRS score on POD90 |                                                          |
| CPSP               | <input type="checkbox"/> Yes <input type="checkbox"/> No |

### The age-adjusted Charlson Comorbidity Index

| Weight       | Comorbid Condition                                                                                                                                                                                                               |
|--------------|----------------------------------------------------------------------------------------------------------------------------------------------------------------------------------------------------------------------------------|
| 1            | Myocardial infarction, congestive heart failure, peripheral vascular disease, cerebral vascular disease, dementia, chronic obstructive pulmonary disease, connective tissue disease, ulcer disease, mild liver disease, diabetes |
| 2            | Hemiplegia, moderate/severe renal disease, diabetes with end-organ damage, any tumor, leukemia/lymphoma                                                                                                                          |
| 3            | Moderate/severe liver disease                                                                                                                                                                                                    |
| 6            | Metastatic solid tumor, AIDS                                                                                                                                                                                                     |
| 1            | For each decade over age 40 years, up to 4 points                                                                                                                                                                                |
| <b>Total</b> |                                                                                                                                                                                                                                  |

AIDS=acquired immune deficiency syndrome.

### The APAIS (the first four items)

| Item                                                            | Score |   |   |   |   |
|-----------------------------------------------------------------|-------|---|---|---|---|
|                                                                 | 1     | 2 | 3 | 4 | 5 |
| 1.I am worried about the anesthetic                             |       |   |   |   |   |
| 2.The anesthetic is on my mind continually                      |       |   |   |   |   |
| 3.I would like to know as much as possible about the anesthetic |       |   |   |   |   |
| 4.Iam worried about the procedure                               |       |   |   |   |   |
| <b>Total scores</b>                                             |       |   |   |   |   |

1: Not at all, 2: Somewhat, 3: Moderate, 4: Moderately high, 5: Extremely

### The FRAIL scale

| Item                | Question                                                                                                                                                                                                               | Score                                                                                   |
|---------------------|------------------------------------------------------------------------------------------------------------------------------------------------------------------------------------------------------------------------|-----------------------------------------------------------------------------------------|
| 1.fatigue           | How much of the time during the past 4 weeks did you feel tired?<br>A=All or most B=Some, a little or none                                                                                                             | <input type="checkbox"/> A=0<br><input type="checkbox"/> B=1                            |
| 2.resistance        | In the past 4 weeks, by yourself and not using aids, do you have any difficulty walking up 10 steps without resting?                                                                                                   | <input type="checkbox"/> Yes=1<br><input type="checkbox"/> No=0                         |
| 3.aerobic           | In the past 4 weeks, by yourself and not using aids, do you have any difficulty walking 300 meters OR one block?                                                                                                       | <input type="checkbox"/> Yes=1<br><input type="checkbox"/> No=0                         |
| 4.illness           | Did your doctor ever tell you that you have?<br>Hypertension; Diabetes; Cancer (not a minor skin cancer)<br>Chronic lung disease; Heart attack; Congestive heart failure;<br>Angina; Asthma; Arthritis; Kidney disease | <input type="checkbox"/> 0-4<br>answers=0<br><input type="checkbox"/> 5-11<br>answers=1 |
| 5.loss of weight    | Have you lost more than 5kg or 5% of your body weight in the past year?                                                                                                                                                | <input type="checkbox"/> Yes =1<br><input type="checkbox"/> No=0                        |
| <b>Total scores</b> | <input type="checkbox"/> ROBUST=0 <input type="checkbox"/> PRE-FRAIL=1-2 <input type="checkbox"/> FRAIL ≥3                                                                                                             |                                                                                         |

### Prince-Henry scale

| Severity of chest pain                                 | Score | POD1                     | POD14                    |
|--------------------------------------------------------|-------|--------------------------|--------------------------|
| No pain on coughing                                    | 1     | <input type="checkbox"/> | <input type="checkbox"/> |
| Pain on coughing or movement but not on deep breathing | 2     | <input type="checkbox"/> | <input type="checkbox"/> |
| Pain on deep breathing but not at rest                 | 3     | <input type="checkbox"/> | <input type="checkbox"/> |
| Slight pain at rest                                    | 4     | <input type="checkbox"/> | <input type="checkbox"/> |
| Severe pain at rest                                    | 5     | <input type="checkbox"/> | <input type="checkbox"/> |

### Numeric rating scale (NRS)

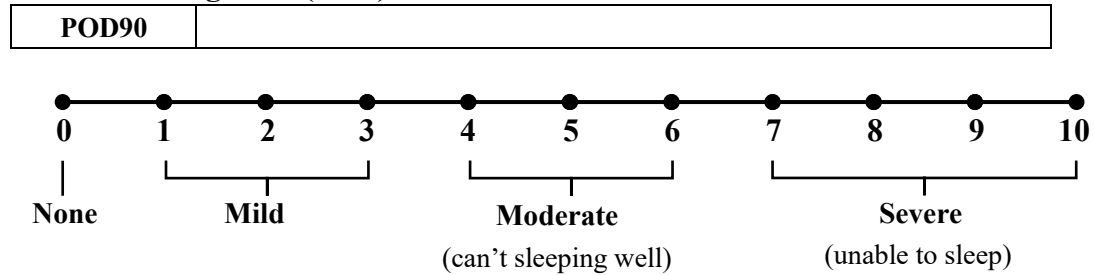

### Douleur Neuropathique 4 questionnaire (the first seven items)

|                                                                                                                        |                          |                          |
|------------------------------------------------------------------------------------------------------------------------|--------------------------|--------------------------|
| Does the pain have one or more of the following characteristics?                                                       |                          |                          |
| <input type="checkbox"/>                                                                                               | Yes (1 point)            | No (0 point)             |
| Burning                                                                                                                | <input type="checkbox"/> | <input type="checkbox"/> |
| Painful cold                                                                                                           | <input type="checkbox"/> | <input type="checkbox"/> |
| Electric shocks                                                                                                        | <input type="checkbox"/> | <input type="checkbox"/> |
| Is the pain associated with one or more of the following symptoms in the same area?                                    |                          |                          |
| <input type="checkbox"/>                                                                                               | Yes (1 point)            | No (0 point)             |
| Tinging                                                                                                                | <input type="checkbox"/> | <input type="checkbox"/> |
| Pins and needles                                                                                                       | <input type="checkbox"/> | <input type="checkbox"/> |
| numbness                                                                                                               | <input type="checkbox"/> | <input type="checkbox"/> |
| itching                                                                                                                | <input type="checkbox"/> | <input type="checkbox"/> |
| is the pain located in an area where the physical examination may reveal one or more of the following characteristics? |                          |                          |
| <input type="checkbox"/>                                                                                               | yes                      | no                       |
| Hypoesthesia to touch                                                                                                  | <input type="checkbox"/> | <input type="checkbox"/> |
| Hypoesthesia to pinprick                                                                                               | <input type="checkbox"/> | <input type="checkbox"/> |
| In the painful area, can the pain be caused or increased by                                                            |                          |                          |
| <input type="checkbox"/>                                                                                               | yes                      | no                       |
| Brushing?                                                                                                              | <input type="checkbox"/> | <input type="checkbox"/> |
| YES = 1 point; NO = 0 points                                                                                           |                          |                          |
| Total scores $\geq 4$ points is considered as neuropathic pain.                                                        |                          |                          |
| Patient's Score: /10                                                                                                   |                          |                          |
